# Supplementary material for: Sleep reactivity as a mediator in the relationship between trait mindfulness and insomnia: a correlational study
Source: Research Square preprint supplement (doi:10.21203/rs.3.rs-7829160/v1), 2025-10-29
Supplement: Supplementary file 1 [file f0b46e0dcf745a1c5a4f46ae.docx]

**Supplementary Table 1. Path coefficients for mediation model with ISI as outcome, including the effects of covariates and nonsignificant paths.**

|  |  |  | **95% CI** | |  |
| --- | --- | --- | --- | --- | --- |
| **Path** | **Estimate** | **SE** | **LL** | **UL** | **p** |
| **Observing → FIRST (a1)** | 0.202 | 0.098 | 0.007 | 0.358 | 0.040 |
| **Describing → FIRST (a2)** | 0.002 | 0.084 | -0.158 | 0.164 | 0.977 |
| **Acting with awareness → FIRST (a3)** | -0.075 | 0.079 | -0.237 | 0.075 | 0.343 |
| **Non-judging → FIRST (a4)** | -0.355 | 0.078 | -0.510 | -0.204 | <0.001 |
| **Non-reacting → FIRST (a5)** | -0.424 | 0.092 | -0.607 | -0.238 | <0.001 |
| **Sex → FIRST** | 2.425 | 0.682 | 1.018 | 3.717 | <0.001 |
| **Sleep disorders → FIRST** | 2.626 | 1.729 | -0.872 | 6.077 | 0.129 |
|  |  |  |  |  |  |
| **Direct effects** |  |  |  |  |  |
| **Observing → ISI (c1)** | 0.156 | 0.072 | 0.016 | 0.299 | 0.031 |
| **Describing → ISI (c2)** | -0.099 | 0.074 | -0.245 | 0.049 | 0.186 |
| **Acting with awareness → ISI (c3)** | -0.079 | 0.063 | -0.205 | 0.049 | 0.210 |
| **Non-judging → ISI (c4)** | -0.076 | 0.065 | -0.204 | 0.055 | 0.245 |
| **Non-reacting → ISI (c5)** | -0.265 | 0.076 | -0.409 | -0.108 | 0.001 |
| **FIRST → ISI (b)** | 0.302 | 0.044 | 0.219 | 0.38 | <0.001 |
| **Sex → ISI** | -1.325 | 0.552 | -2.419 | -0.274 | 0.016 |
| **Sleep disorders → ISI** | 5.127 | 1.369 | 2.472 | 7.886 | <0.001 |
|  |  |  |  |  |  |
| **Indirect effects** |  |  |  |  |  |
| **Observing → FIRST → ISI (a1 x b)** | 0.061 | 0.031 | 0.002 | 0.124 |  |
| **Describing → FIRST → ISI (a2 x b)** | 0.001 | 0.026 | -0.050 | 0.050 |  |
| **Acting with awareness → FIRST → ISI (a3 x b)** | -0.023 | 0.025 | -0.074 | 0.022 |  |
| **Non-judging → FIRST → ISI (a4 x b)** | -0.107 | 0.029 | -0.169 | -0.055 |  |
| **Non-reacting → FIRST → ISI (a5 x b)** | -0.128 | 0.03 | -0.198 | -0.066 |  |
|  |  |  |  |  |  |
| **Total effects** |  |  |  |  |  |
| **Observing → ISI (c1 + a1 x b)** | 0.217 | 0.077 | 0.070 | 0.367 |  |
| **Describing → ISI (c2 + a2 x b)** | -0.098 | 0.080 | -0.249 | 0.059 |  |
| **Acting with awareness → ISI (c3 + a3 x b)** | -0.102 | 0.07 | -0.240 | 0.037 |  |
| **Non-judging → ISI (c4 + a4 x b)** | -0.183 | 0.066 | -0.312 | -0.050 |  |
| **Non-reacting → ISI (c5 + a5 x b)** | -0.393 | 0.078 | -0.545 | -0.235 |  |

*Note. 95% CI = bootstrapped confidence intervals; LL and UL = lower and upper limits of CI; Sex is coded as 0 = male, 1 = female; Sleep disorders is coded as 0 = absent, 1 = present.*

*Abbreviations. FIRST = Ford Insomnia Response to Stress Test; ISI = Insomnia Severity Index.*
